# Supplementary material for: Luminescence Properties of Ho2O3-Doped Y2O3 Stabilized ZrO2 Single Crystals
Source: MDPI journal article supplement (doi:10.3390/cryst12030415), 2022-03-17
Supplement: s1 [file s1]

# Luminescence Properties of Ho<sub>2</sub>O<sub>3</sub>-Doped Y<sub>2</sub>O<sub>3</sub> Stabilized ZrO<sub>2</sub> Single Crystals

**Yuhua Yang, Shoulei Xu, Siyao Li, Wenxia Wu, Yihua Pan, Daini Wang, Xing Hong, Zeyu Cheng and Wen Deng \***

School of Physical Science and Technology, Guangxi University, 100 East Daxue Road, Nanning 530004, Guangxi, China; 19073011101@st.gxu.edu.cn (Y.Y.); xsl@gxu.edu.cn (S.X.); 1807301030@st.gxu.edu.cn (S.L.); 1907301088@st.gxu.edu.cn (W.W.); 1907301064@st.gxu.edu.cn (Y.P.); 1807301058@st.gxu.edu.cn (D.W.); 1807301016@st.gxu.edu.cn (X.H.); 2007301021@st.gxu.edu.cn (Z.C.)

\* Correspondence: wdeng@gxu.edu.cn; Tel.: +86-771-323-2666

**Citation:** Yang, Y.; Xu, S.; Li, S.; Wu, W.; Pan, Y.; Wang, D.; Hong, X.; Cheng, Z.; Deng, W. Luminescence Properties of  $\text{Ho}_2\text{O}_3$ -Doped  $\text{Y}_2\text{O}_3$  Stabilized  $\text{ZrO}_2$  Single Crystals. *Crystals* **2022**, *12*, 415.  
<https://doi.org/10.3390/cryst12030415>

Academic Editors: Pavel Lukáč and  
Alessandro Chiasera

Received: 28 January 2022

Accepted: 15 March 2022

Published: 17 March 2022

**Publisher’s Note:** MDPI stays neutral with regard to jurisdictional claims in published maps and institutional affiliations.

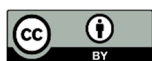

**Copyright:** © 2022 by the authors. Licensee MDPI, Basel, Switzerland. This article is an open access article distributed under the terms and conditions of the Creative Commons Attribution (CC BY) license (<https://creativecommons.org/licenses/by/4.0/>).

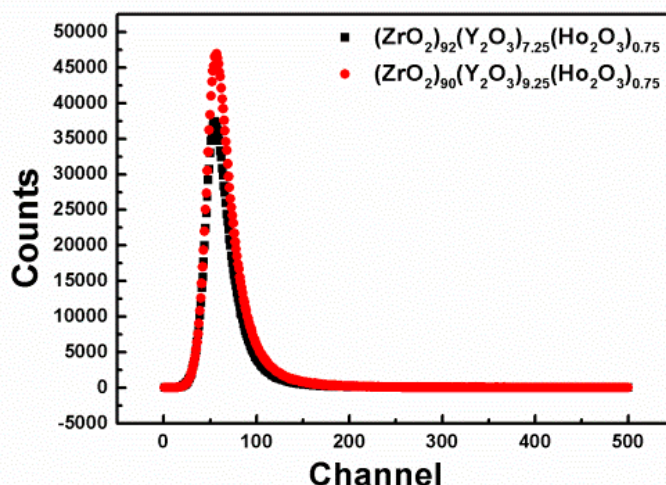

**Figure S1.** Positron annihilation lifetime spectra of  $(\text{ZrO}_2)_{92}(\text{Y}_2\text{O}_3)_{7.25}(\text{Ho}_2\text{O}_3)_{0.75}$  and  $(\text{ZrO}_2)_{90}(\text{Y}_2\text{O}_3)_{9.25}(\text{Ho}_2\text{O}_3)_{0.75}$  crystals.

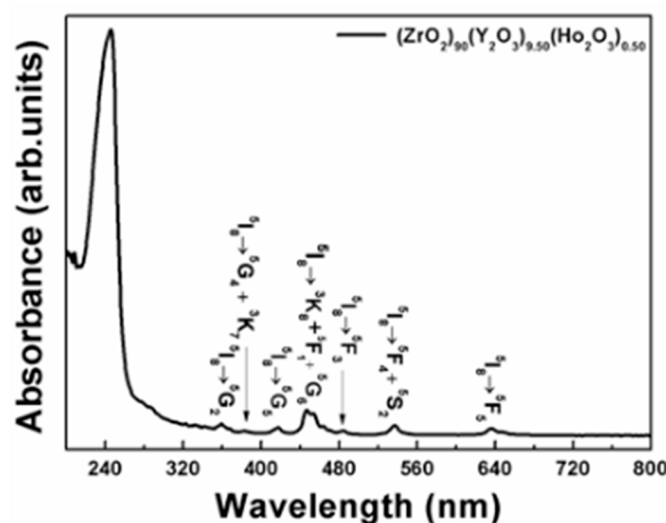

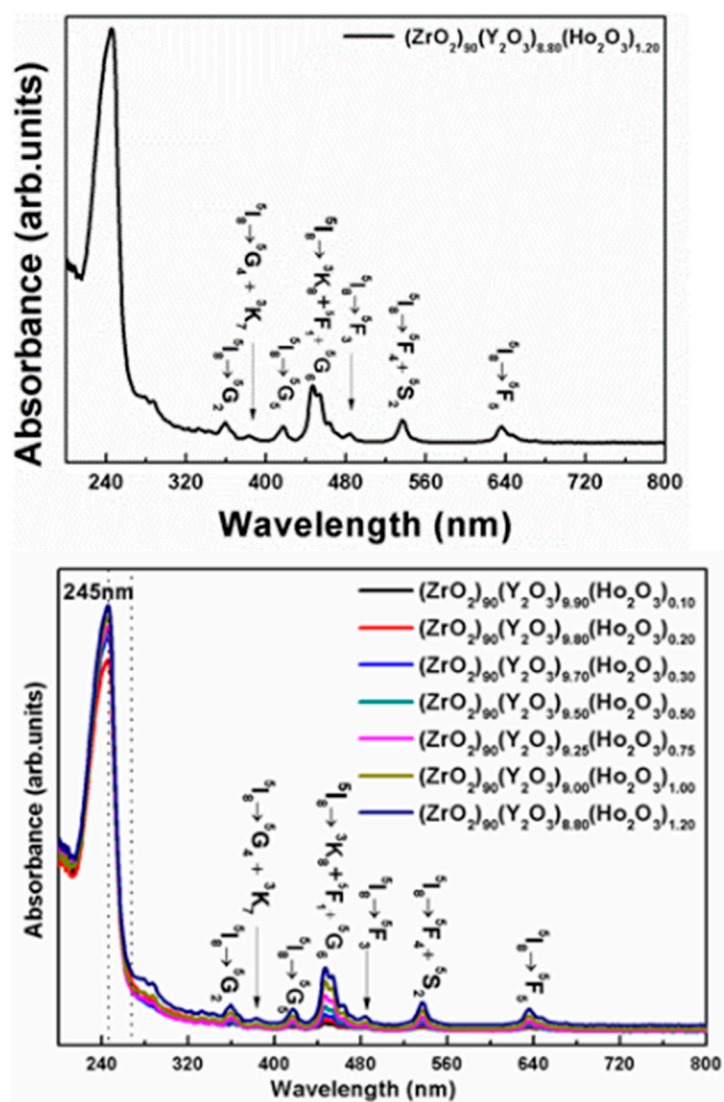

Figure S2. UV-vis absorption spectra of the  $(\text{ZrO}_2)_{90}(\text{Y}_2\text{O}_3)_{10-x}(\text{Ho}_2\text{O}_3)_x$  crystal discs.
